# Supplementary material for: Stable cyclic ether as an electrolyte additive for high-performance lithium metal batteries
Source: Royal Society of Chemistry journal article supplement (doi:10.1039/d4cc03056g), 2024-01-01
Supplement: d4cc03056g1.pdf [file d4cc03056g1.pdf]

## Supporting Information

### Stable cyclic ether as an electrolyte additive for high-performance lithium metal batteries

Tao Yang<sup>1,+</sup>, Hanxu Yang<sup>1,+</sup>, Jiahang Zou<sup>1</sup>, Liang Li<sup>1</sup>, Shilin Wu<sup>1</sup>, Meinan Zhao<sup>1\*</sup>, Zhipeng Jiang<sup>1,2\*</sup> and Yongtao Li<sup>1,2\*</sup>

<sup>1</sup>School of Materials Science and Engineering, Key Laboratory of Green Fabrication and Surface Technology of Advanced Metal Materials of Ministry of Education, Anhui University of Technology, Maanshan 243002, China.

<sup>2</sup>Key Laboratory of Efficient Conversion and Solid-state Storage of Hydrogen & Electricity of Anhui Province, Maanshan 243002, China.

<sup>+</sup> T. Y. and H. Y. contributed equally to this work.

\*Corresponding author.

E-mail: zhaomeinan@ahut.edu.cn, jzp1994@ahut.edu.cn, liyongtao@ahut.edu.cn

## Experimental section

**Materials:** Lithium hexafluorophosphate ( $\text{LiPF}_6$ , 99.9%), diethyl carbonate (DEC, 99%), ethylene carbonate (EC, 99%), and 1,3-dioxolane (DOL, 99%) were provided by Meryer Chemical Reagent Co., Ltd. 4-methyl-1,3-dioxolane (4-Me DOL, 99%) was provided by Aladdin. Lithium foil with a thickness of 400  $\mu\text{m}$  was provided by China Energy Lithium Co., Ltd. Copper (Cu) foil with a thickness of 16  $\mu\text{m}$  was purchased from Shenzhen Jingliang Copper Industry Co., Ltd. Carbon-coated aluminum (Al) foil (15  $\mu\text{m}$ ),  $\text{LiNi}_{0.6}\text{Co}_{0.2}\text{Mn}_{0.2}\text{O}_2$  (NCM622), polyethylene (PE) separators, and Super P conductive carbon black were obtained from Guangdong Canrd New Energy Technology Co., Ltd. The commercial  $\text{LiNi}_{0.8}\text{Co}_{0.1}\text{Mn}_{0.1}\text{O}_2$  (NCM811,  $\sim 18 \text{ mg cm}^{-2}$ ,  $3 \text{ mAh cm}^{-2}$ ) electrode was supplied by Hunan Lifang New Energy Technology Co., Ltd.

**Electrolyte Preparation:** The electrolyte used in the experimental group consisted of a mixture of 1 M  $\text{LiPF}_6$ , EC/DEC (v/v = 1:1), and 1 vol% 4-Me DOL (BE + 4-Me DOL). The control electrolytes included 1 M  $\text{LiPF}_6$  in EC/DEC (v/v = 1:1) (BE), and a mixture of 1 M  $\text{LiPF}_6$  in EC/DEC (v/v = 1:1) with 1 vol% DOL (BE + DOL).

**Electrochemical measurements:** The battery configuration is as follows: Li-Cu half-cell, Li-Al cell, Li-Li symmetric cell, Li-NCM622 cell, and Li-NCM811 full cell. The Li-Cu half-cell consists of Li foil (14 mm, 400  $\mu\text{m}$ ), Cu foil (16 mm), and 40  $\mu\text{L}$  of electrolyte. The structure of the Li-Al cell includes Li foil (14 mm, 400  $\mu\text{m}$ ) and Al foil (16 mm). The Li-Li symmetric cell was constructed using two Li foil (14 mm, 400  $\mu\text{m}$ ) with 40  $\mu\text{L}$  of electrolyte. Constant current charge-discharge was performed at  $3 \text{ mA cm}^{-2}$ ,  $1 \text{ mAh cm}^{-2}$ , and  $0.5 \text{ mAh cm}^{-2}$ . Additionally, rate capability charge-discharge was conducted at  $0.5 \text{ mAh cm}^{-2}$ ,  $1 \text{ mAh cm}^{-2}$ ,  $2 \text{ mAh cm}^{-2}$ , and  $3 \text{ mAh cm}^{-2}$  for the cell. NCM622 cathodes were prepared by scraping a blend of NCM622, Super P, and PVDF in a ratio of 8:1:1 ( $1.5 \text{ mg cm}^{-2}$ ). The Li-NCM622 cell was assembled from an NCM622 cathode ( $\varphi 8 \text{ mm}$ ,  $1.5 \text{ mg cm}^{-2}$ ), a PE separator ( $\varphi 19 \text{ mm}$ ), and a Li foil ( $\varphi 14 \text{ mm}$ , 400  $\mu\text{m}$ ) with the addition of 40  $\mu\text{L}$  of electrolyte for cycling and rate tests. Cycling tests were conducted at 25  $^\circ\text{C}$  within a voltage range of 3 to 4.3 V at a rate of 1 C, along with rate capability tests at 0.5 C, 1 C, 2 C, 5 C, and 10 C. The Li-NCM811 full cell was assembled from a commercial NCM811 cathode ( $\varphi 8 \text{ mm}$ ,  $\sim 18 \text{ mg cm}^{-2}$ ,  $3 \text{ mAh cm}^{-2}$ ), a PE

separator ( $\varnothing$ 19 mm), and a Li foil ( $\varnothing$ 14 mm, 400  $\mu$ m) with the addition of 40  $\mu$ L of electrolyte for cycling tests at 0.33 C charging and 0.66 C discharging. Cyclic voltammetry (CV) measurements of the Li-Cu half-cell were conducted using a CHI660E electrochemical workstation, and the scan rate was set to 1  $\text{mV s}^{-1}$ , with a scan range from 3 to 0 V. Linear sweep voltammetry (LSV) measurements of the Li-Al cell were conducted using a CHI660E electrochemical workstation with a scan rate of 1  $\text{mV s}^{-1}$ . Tafel plot analysis of the Li-Li symmetric cell was performed using the CHI660E electrochemical workstation within a voltage range of -0.2 to 0.2 V, also with a scan rate of 1  $\text{mV s}^{-1}$ . Electrochemical impedance spectroscopy (EIS) measurements were conducted using a CHI660E electrochemical workstation with a frequency range of 100 kHz to 0.1 Hz. All coin cells were assembled in a controlled environment inside a glovebox filled with Ar ( $\text{H}_2\text{O}$  content < 0.1 ppm,  $\text{O}_2$  content < 0.1 ppm).

**Material Characterization:** The sample with deposited Li was rinsed three times with DEC solution before analysis to remove residual electrolytes and then air-dried at room temperature. SEM observation and X-ray photoelectron spectroscopy (XPS) analysis were conducted using a Field Emission NANO SEM430 and a Thermo Scientific K-Alpha from the United States, respectively, to observe the morphology and chemical composition of the deposited Li. FTIR spectra of the electrolyte were measured using a Nicolet iS20. Density functional theory (DFT) calculations of energy levels were performed using the Vienna ab-initio Simulation Package (VASP). The Perdew-Burke-Ernzerhof (PBE) with generalized gradient approximation (GGA) was employed for the exchange-correlation functional.

## Supplementary Figures

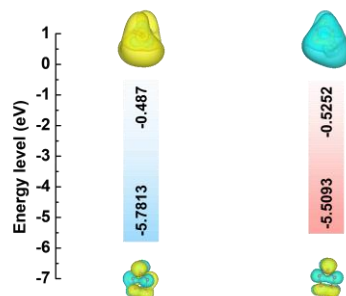

**Fig. S1** LUMO–HOMO energy level diagram of DOL and 4-Me DOL.

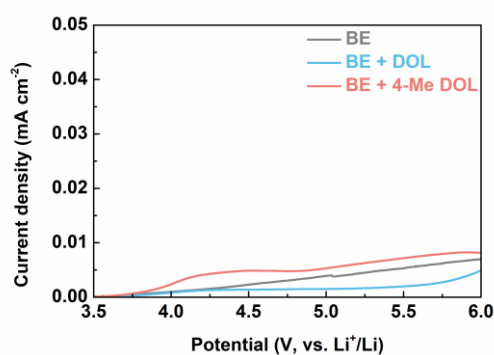

**Fig. S2** LSV plots of different electrolytes.

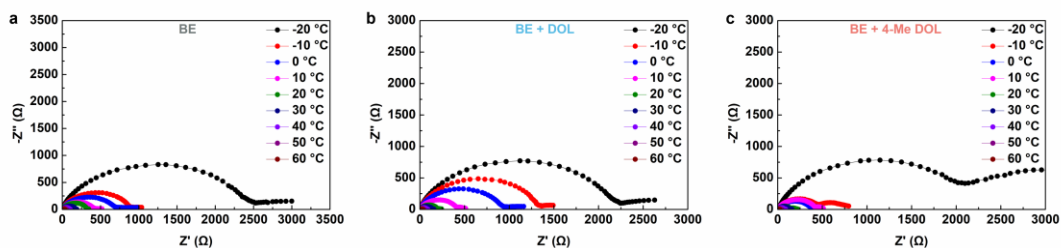

**Fig. S3** EIS plots of the Li-Li cells using various electrolytes at different temperatures.

(a) BE, (b) BE + DOL, (c) BE + 4-Me DOL.

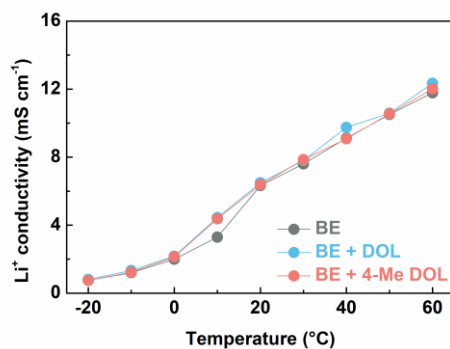

**Fig. S4** Li<sup>+</sup> conductivity of different electrolytes at various temperatures.

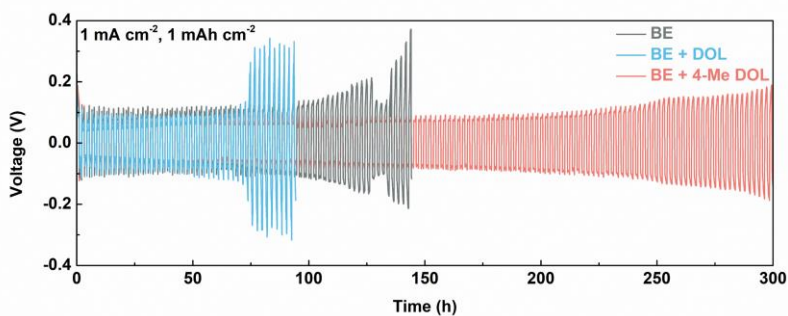

**Fig. S5** Cycling tests of Li-Li cells using various electrolytes. ( $1 \text{ mA cm}^{-2}$ ,  $1 \text{ mAh cm}^{-2}$ )

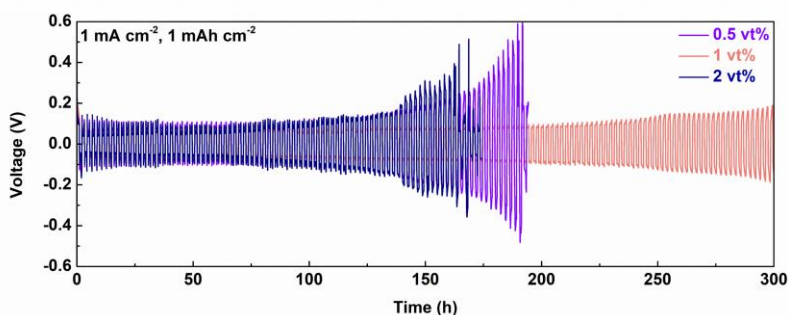

**Fig. S6** Long-term cycling tests of Li-Li cells using BE adding with different concentrations of 4-Me DOL. ( $1 \text{ mA cm}^{-2}$ ,  $1 \text{ mAh cm}^{-2}$ )

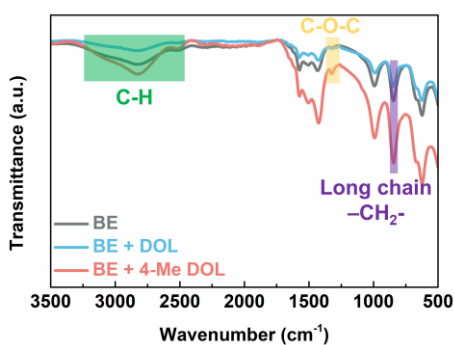

**Fig. S7** FTIR spectra of deposited Li using various electrolytes.

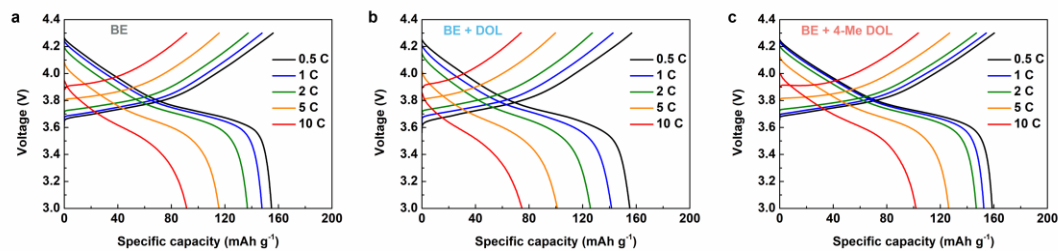

**Fig. S8** Voltage profiles of the Li-NCM622 cells cycled with rates using various electrolytes. (a) BE, (b) BE + DOL, (c) BE + 4-Me DOL.

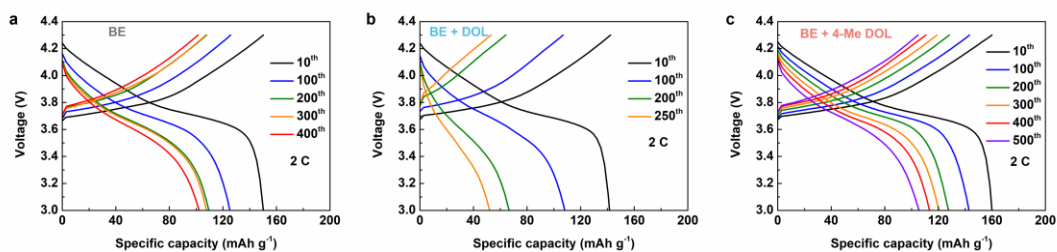

**Fig. S9** Typical voltage profiles of the Li-NCM622 cells cycled at 2 C using different electrolytes. (a) BE, (b) BE + DOL, (c) BE + 4-Me DOL.

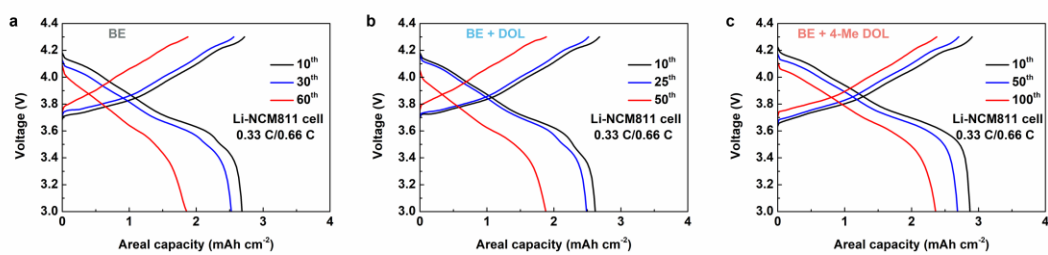

**Fig. S10** Typical voltage profiles of the Li-NCM811 full cells using different electrolytes. (a) BE, (b) BE + DOL, (c) BE + 4-Me DOL.
